# Supplementary material for: Natural kaolin derived stable SBA-15 as a support for Fe/BiOCl: a novel and efficient Fenton-like catalyst for the degradation of 2-nitrophenol
Source: Royal Society of Chemistry journal article supplement (doi:10.1039/c5ra01804h), 2015-01-01
Supplement: c5ra01804h1.pdf [file c5ra01804h1.pdf]

## Supporting Information

Natural kaolin derived stable SBA-15 as support for Fe/BiOCl: A novel  
and efficient fenton-like catalyst for degradation of 2-nitrophenol

Qihang Zhao, Xiaoyan Liu, Menglin Sun, Chunfang Du\* and Zhiliang Liu\*

*College of Chemistry and Chemical Engineering, Inner Mongolia University, Hohhot, Inner*

*Mongolia 010021, P. R. China*

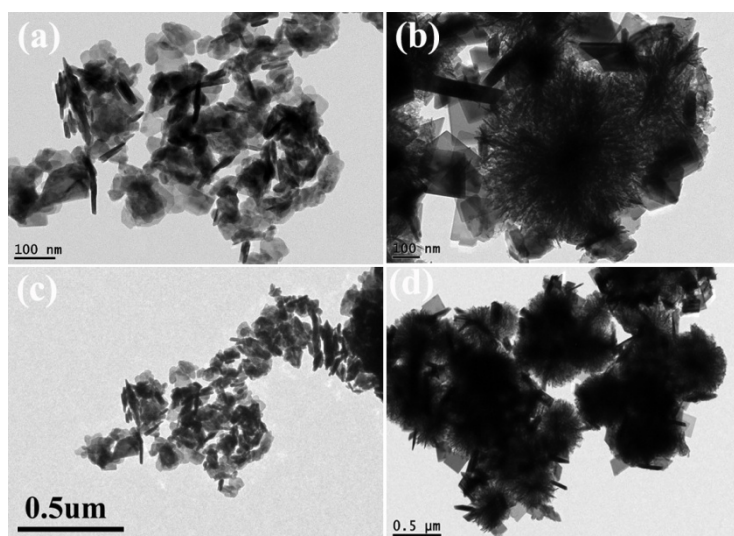

Figure S1 TEM images of pure BiOCl (a and c) and Fe/BiOCl (b and d)

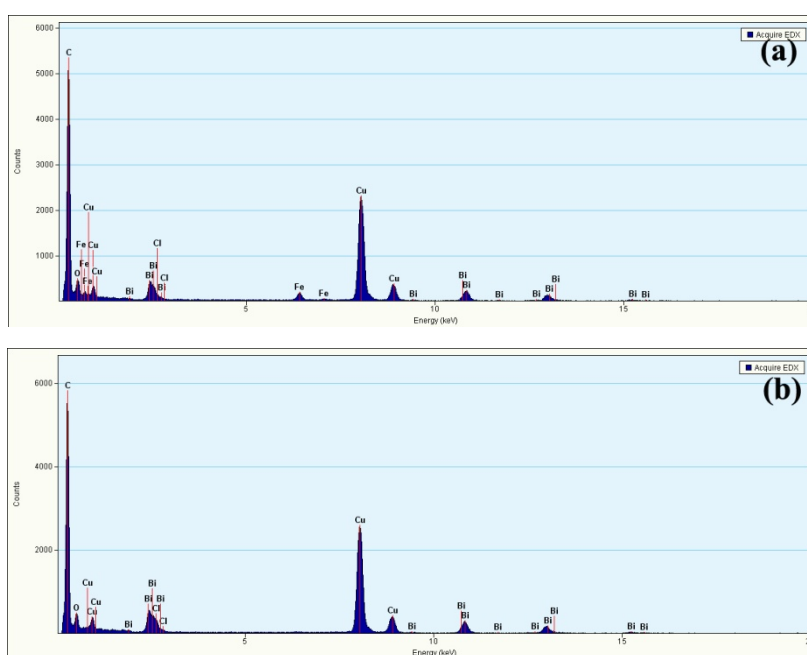

Figure S2 EDS spectrum of flower-like Fe/BiOCl (a) and nanosheet Fe/BiOCl (b) in the catalyst

0.5Fe/BiOCl-FCSBA-15(0.6)

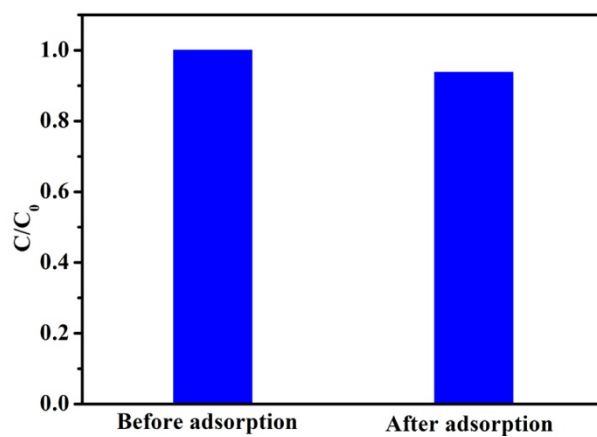

Figure S3 The adsorption behavior of catalyst 0.5Fe/BiOCl-FCSBA-15(0.6) on 2-nitrophenol

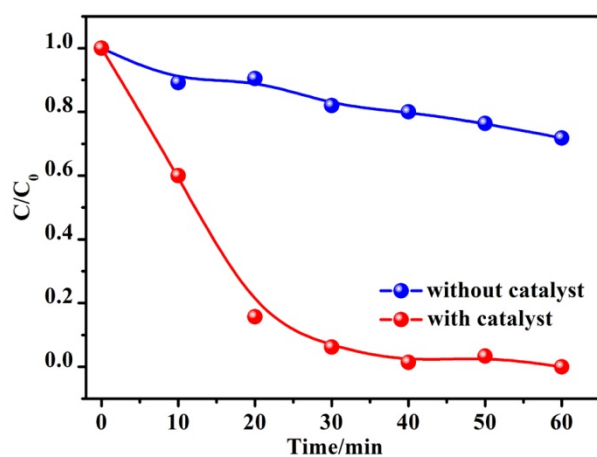

Figure S4 The degradation efficiency of 2-nitrophenol with or without catalyst ( $T=60^{\circ}\text{C}$ ,  $\text{pH}=4$ ,  $\text{H}_2\text{O}_2$  dosage=800 mg/L, Fe/Bi molar ratio=0.5, Bi/Si molar ratio=0.6)

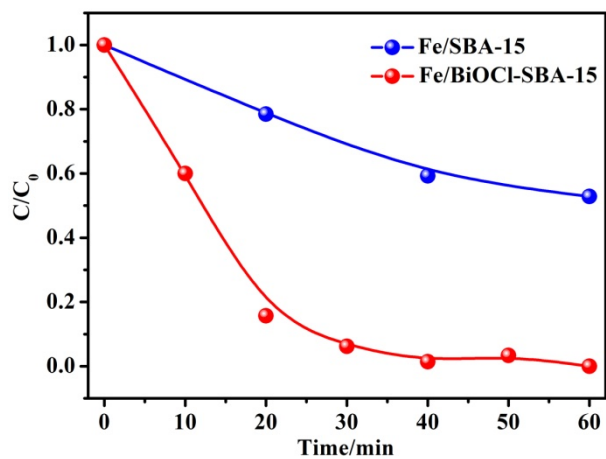

Figure S5 The degradation efficiency of 2-nitrophenol over catalysts Fe/FCSBA-15 and Fe/BiOCl-FCSBA-15 ( $T=60^{\circ}\text{C}$ ,  $\text{pH}=4$ ,  $\text{H}_2\text{O}_2$  dosage=800 mg/L)

The synthesis procedure of Fe/FCSBA-15 was as follows: 2.02 g  $\text{Fe}(\text{NO}_3)_3 \cdot 9\text{H}_2\text{O}$  was dissolved in 20 mL deionized water, subsequently a certain amount of FCSBA-15 was added with stirring for 1 h. The mixture was then transferred into a 100 mL Teflon-lined stainless steel autoclave, heated up to  $110^{\circ}\text{C}$  and kept at this temperature for 8 h. The resulting precipitate was collected by centrifugation, then washed with ethanol and deionized water for several times, then dried at  $60^{\circ}\text{C}$  in vacuum and treated at  $400^{\circ}\text{C}$  for 3 h.

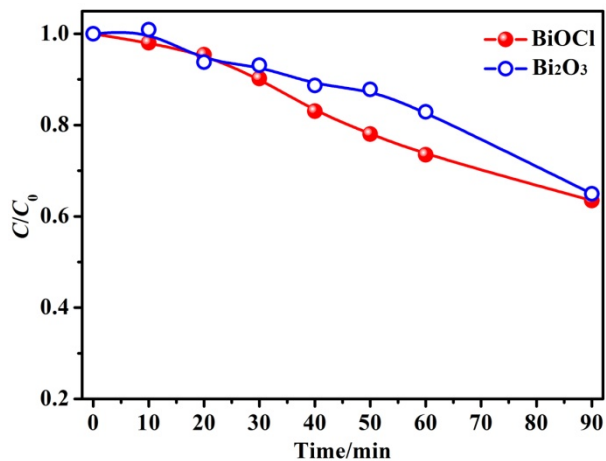

Figure S6 The degradation efficiency of 2-nitrophenol over BiOCl and Bi<sub>2</sub>O<sub>3</sub> ( $T=60^{\circ}\text{C}$ ,  $\text{pH}=4$ ,  $\text{H}_2\text{O}_2$  dosage=800 mg/L)

The synthesis procedure of BiOCl was as follows: 4 mmol Bi(NO<sub>3</sub>)<sub>3</sub>·5H<sub>2</sub>O was dissolved in 190 mL of glycerol, denoted as solution A. Then, 4 mmol KCl was dissolved in 10 mL of deionized water (solution B), which was subsequently poured into solution A. The mixture was transferred into a 200 mL Teflon-lined stainless steel autoclave, heated to 150 °C and kept at this temperature for 8 h. The resulting precipitate was collected by centrifugation, then washed with ethanol and deionized water for several times, and dried at 60 °C in vacuum to obtain BiOCl powder.

In a typical synthesis procedure of Bi<sub>2</sub>O<sub>3</sub>, 0.364 g Bi(NO<sub>3</sub>)<sub>3</sub>·5H<sub>2</sub>O was dissolved in 10 mL of 1M dilute HNO<sub>3</sub>. Then 0.16 g urea, a certain amount of ethylene glycol and subsequently 0.6 g PVP were added with stirring. The obtained mixture was transferred into a Teflon-lined stainless steel autoclave and kept at 150 °C for 3 h. The resulting precipitate was collected by centrifugation, then washed with ethanol and deionized water for several times, and dried at 60 °C for 12 h. After treatment at 600 °C for 3 h, Bi<sub>2</sub>O<sub>3</sub> powder was obtained.

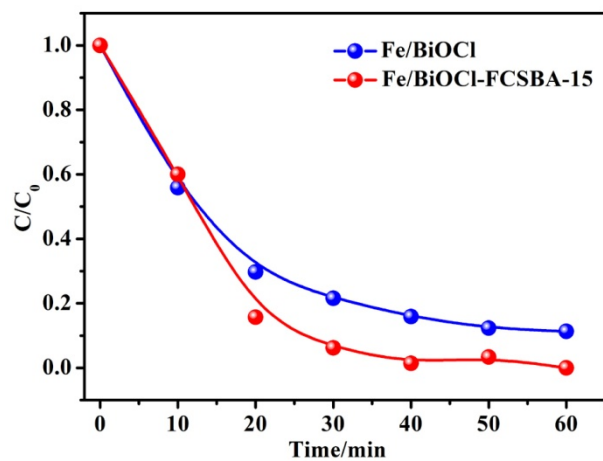

Figure S7 The degradation efficiency of 2-nitrophenol over catalysts Fe/BiOCl with or without matrix FCSBA-15 ( $T=60^{\circ}\text{C}$ ,  $\text{pH}=4$ ,  $\text{H}_2\text{O}_2$  dosage=800 mg/L, Fe/Bi molar ratio=0.5, Bi/Si molar ratio=0.6)

The synthesis process of Fe/BiOCl was the same as that of Fe/BiOCl-FCSBA-15, except the addition of the matrix FCSBA-15.

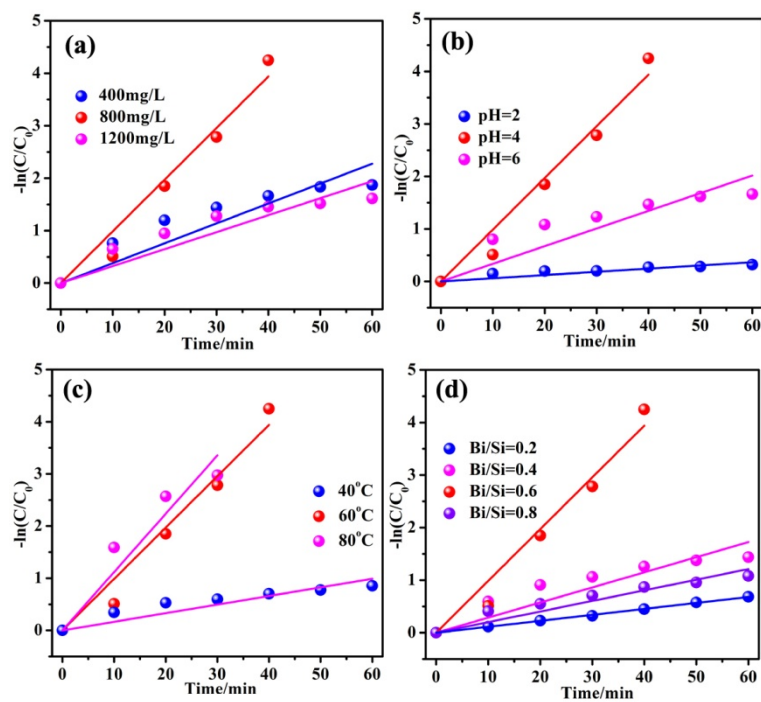

Figure S8 Effect of various variables on reaction rate constants in the degradation of 2-nitrophenol over catalyst Fe/BiOCl-FCSBA-15. (a) Effect of  $H_2O_2$  dosage ( $T=60^\circ C$ ,  $pH=4$ , Fe/Bi molar ratio=0.5, Bi/Si molar ratio=0.6); (b) Effect of pH value ( $T=60^\circ C$ ,  $H_2O_2$  dosage=800 mg/L, Fe/Bi molar ratio=0.5, Bi/Si molar ratio=0.6); (c) Effect of oxidation temperature ( $pH=4$ ,  $H_2O_2$  dosage=800 mg, Fe/Bi molar ratio=0.5, Bi/Si molar ratio=0.6); (d) Effect of Bi/Si molar ratio ( $T=60^\circ C$ ,  $pH=4$ ,  $H_2O_2$  dosage=800 mg/L, Fe/Bi molar ratio=0.5)

Table S1

Reaction rate constants in the degradation of 2-nitrophenol over catalyst Fe/BiOCl-FCSBA-15

| Parameters                                  |      | Reaction rate constants ( $10^{-2} \text{ min}^{-1}$ ) |
|---------------------------------------------|------|--------------------------------------------------------|
| H <sub>2</sub> O <sub>2</sub> dosage (mg/L) | 400  | 3.80                                                   |
|                                             | 800  | 9.85                                                   |
|                                             | 1200 | 3.24                                                   |
| pH values                                   | 2    | 0.61                                                   |
|                                             | 4    | 9.85                                                   |
|                                             | 6    | 3.36                                                   |
| Temperature (°C)                            | 40   | 1.65                                                   |
|                                             | 60   | 9.85                                                   |
|                                             | 80   | 11.18                                                  |
| Fe/Bi molar ratio                           | 0.2  | 2.74                                                   |
|                                             | 0.5  | 9.85                                                   |
|                                             | 1.0  | 4.30                                                   |
| Bi/Si molar ratio                           | 0.2  | 1.13                                                   |
|                                             | 0.4  | 2.02                                                   |
|                                             | 0.6  | 9.85                                                   |
|                                             | 0.8  | 2.87                                                   |



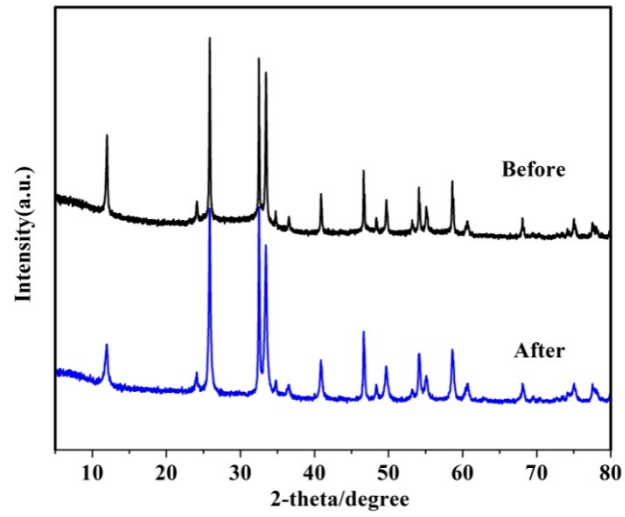

Figure S9 XRD patterns of catalyst 0.5Fe/BiOCl-FCSBA-15(0.6) before and after Fenton-like reaction ( $T=60^{\circ}\text{C}$ ,  $\text{pH}=4$ ,  $\text{H}_2\text{O}_2$  dosage=800 mg/L)

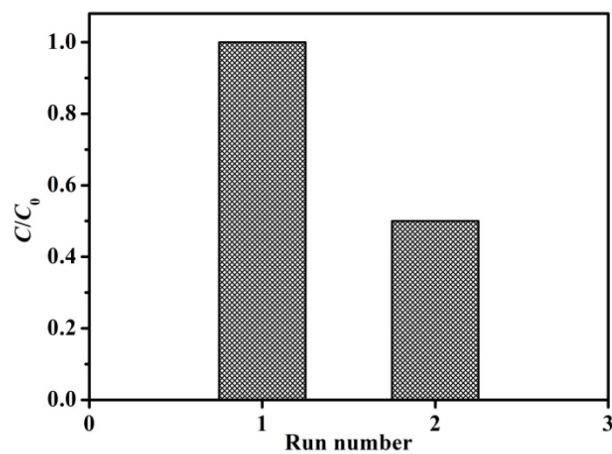

Figure S10 The reusability of catalyst 0.5Fe/BiOCl-FCSBA-15(0.6) ( $T=60^{\circ}\text{C}$ ,  $\text{pH}=4$ ,  $\text{H}_2\text{O}_2$  dosage=800 mg/L)
